# Supplementary material for: Ubiquitin Carboxyl-Terminal Hydrolase L1 and Its Role in Parkinson’s Disease
Source: MDPI journal article supplement (doi:10.3390/ijms25021303), 2024-01-21
Supplement: s1 [file s1]

**Table S1.** UCHL1-interacting proteins

| #  | Gene name | Protein name                                          | Function | Localization  | References |
|----|-----------|-------------------------------------------------------|----------|---------------|------------|
| 1  | EGFR      | Epidermal growth factor receptor                      | 3        | PM, EPR, M    | 1          |
| 2  | NCAM1     | Neural cell adhesion molecule 1                       | 3        | PM            | 1          |
| 3  | APP       | Amyloid-beta precursor protein                        | 3        | PM, EPR, M    | 1          |
| 4  | ADRA2a    | Alpha-2A adrenergic receptor                          | 3        | PM            | 1          |
| 5  | ADRA2c    | Alpha-2C adrenergic receptor                          | 3        | PM            | 1          |
| 6  | VCL       | Vinculin                                              | 2        | C, PM         | 1          |
| 7  | HSP90aa1  | Heat Shock Protein 90 Alpha Family Class A Member 1   | 4        | C, N, Mch, PM | 1, 8       |
| 8  | TRIM54    | Tripartite motif-containing protein 54                | 6        | C             | 1          |
| 9  | TNIK      | TRAF2 and NCK-interacting protein kinase              | 3        | C, N          | 1          |
| 10 | TRAF6     | TNF receptor-associated factor 6                      | 6        | C, N          | 1          |
| 11 | HNF4a     | Hepatocyte nuclear factor 4-alpha                     | 5        | N             | 1          |
| 12 | CTNND1    | Catenin delta-1                                       | 3        | C, N, PM, M   | 1          |
| 13 | CTNNB1    | Catenin beta-1                                        | 3        | C, N, PM, M   | 1          |
| 14 | CDKN1b    | Cyclin-dependent kinase inhibitor 1B                  | 3        | C, N          | 1          |
| 15 | UBE2L     | Ubiquitin-conjugating enzyme E2L                      | 6        | N             | 1          |
| 16 | TP53      | TP53-binding protein 1                                | 5        | N             | 1          |
| 17 | SNCA      | Alpha-synuclein                                       | 3        | C, M, N       | 1, 4       |
| 18 | KRT17     | Keratin, type I cytoskeletal 17                       | 2        | C             | 1          |
| 19 | PTK2      | Serine/threonine-protein kinase PTK2                  | 3        | C, N          | 1          |
| 20 | PXN       | Peroxisomal nicotinamide adenine dinucleotide carrier | 3        | P             | 1          |
| 21 | AKT1      | Potassium channel AKT1                                | 2        | PM            | 1          |

|    |           |                                                       |   |               |   |
|----|-----------|-------------------------------------------------------|---|---------------|---|
| 22 | HTT       | Huntingtin                                            | 2 | C, N          | 1 |
| 23 | ADRB2     | Beta-2 adrenergic receptor                            | 3 | PM            | 1 |
| 24 | ATG3      | Ubiquitin-like-conjugating enzyme<br>ATG3             | 6 | C             | 1 |
| 25 | UBB       | Polyubiquitin-B                                       | 6 | C, N, Mch     | 1 |
| 26 | VHL       | von Hippel-Lindau disease tumor<br>suppressor         | 6 | C, N, PM, EPR | 1 |
| 27 | CDKN2a    | Tumor suppressor ARF                                  | 3 | N, Mch        | 1 |
| 28 | TRIM63    | E3 ubiquitin-protein ligase TRIM63                    | 6 | C, N          | 1 |
| 29 | USP21     | Ubiquitin carboxyl-terminal<br>hydrolase 21           | 6 | N, C          | 1 |
| 30 | ATG5      | Autophagy protein 5                                   | 4 | C             | 1 |
| 31 | RPTOR     | Regulatory-associated protein of<br>mTOR              | 5 | C             | 1 |
| 32 | HSPA8     | Heat shock cognate 71 kDa protein                     | 4 | C, N, PM      | 1 |
| 33 | COPS5     | COP9 signalosome complex<br>subunit 5                 | 3 | C, N          | 1 |
| 34 | CDK1      | Cyclin-dependent kinase 1                             | 3 | N, C, Mch     | 1 |
| 35 | SMN1/SMN2 | Survival motor neuron protein                         | 5 | N, C          | 1 |
| 36 | CDK2      | Cyclin-dependent kinase 2                             | 3 | C, N          | 1 |
| 37 | PMAIP1    | Phorbol-12-myristate-13-acetate-<br>induced protein 1 | 4 | Mch           | 1 |
| 38 | ADRA2b    | Alpha-2B adrenergic receptor                          | 3 | PM            | 1 |
| 39 | TUBA1a    | Tubulin alpha-1A chain                                | 2 | C             | 1 |
| 40 | LAMP2     | Lysosome-associated membrane<br>glycoprotein 2        | 4 | PM, C, M      | 1 |
| 41 | NEDD8     | NEDD8 (Ubiquitin-like protein)                        | 6 | N             | 1 |
| 42 | PTOV1     | Prostate tumor-overexpressed gene<br>1 protein        | 5 | N, C, PM, M   | 1 |
| 43 | RANBP9    | Importin-9                                            | 3 | N, C          | 1 |
| 44 | TINF2     | TERF1-interacting nuclear factor 2                    | 5 | N             | 1 |

|    |        |                                             |   |                |      |
|----|--------|---------------------------------------------|---|----------------|------|
| 45 | USP28  | Ubiquitin carboxyl-terminal hydrolase 28    | 6 | N              | 1    |
| 46 | CBX1   | Chromobox protein homolog 1                 | 6 | N              | 1    |
| 47 | EIF1B  | Eukaryotic translation initiation factor 1b | 6 | C              | 1    |
| 48 | KRT4   | Keratin, type II cuticular Hb4              | 2 | C              | 1    |
| 49 | MCC    | Colorectal mutant cancer protein            | 3 | C, N, PM       | 1    |
| 50 | PRDX2  | Peroxiredoxin-2                             | 4 | C              | 6    |
| 51 | UBA52  | Monoubiquitin                               | 6 | C, N, PM, Mch  | 2, 3 |
| 52 | PARK2  | E3 ubiquitin-protein ligase parkin          | 6 | C, N, EPR, Mch | 5    |
| 53 | HSP70  | Heat shock 70 kDa protein                   | 4 | C, N           | 7, 8 |
| 54 | AMPK   | 5'-AMP-activated protein kinase             | 3 | C, N           | 9    |
| 55 | ULK1   | Unc-51-like kinase 1                        | 3 | C              | 9    |
| 56 | FUNDC1 | FUN14 domain-containing protein 1           | 3 | Mch            | 9    |
| 57 | PKM    | Pyruvate kinase PKM                         | 1 | C              | 9    |
| 58 | MFN2   | Mitofusin-2                                 | 3 | Mch            | 10   |

Localization: C – cytoplasm; EPR –endoplasmic reticulum; M – membranes; PM – plasma membrane; Mch – mitochondria; N – nucleus, P – peroxisomes. Functional groups: 1. Proteins involved in energy generation and carbohydrate metabolism; 2. Proteins involved in cytoskeleton formation and exocytosis; 3. Protein involved in signal transduction and regulation of enzyme activity; 4. Antioxidant and protective proteins/enzymes; 5. Protein regulators of gene expression, cell division and differentiation; 6. Enzymes, involved in metabolism of proteins, amino acids and other nitrogenous compounds.

#### References

1. Jara, J.H.; Genç, B.; Cox, G.A.; Bohn, M.C.; Roos, R.P.; Macklis, J.D.; Ulupinar, E.; Özdinler, P.H. Corticospinal Motor Neurons Are Susceptible to Increased ER Stress and Display Profound Degeneration in the Absence of UCHL1 Function. *Cereb. Cortex* **2015**, *25*, 259–272. doi: 10.1093/cercor/bhu318.
2. Osaka, H.; Wang, Y.L.; Takada, K.; Takizawa, S.; Setsuie, R.; Li, H.; Sato, Y.; Nishikawa K.; Sun, Y.J.; Sakurai, M.; Harada, T.; Hara, Y.; Kimura, I.; Chiba, S.; Namikawa, K.; Kiyama, H.; Noda, M.; Aoki, S.; Wada, K. Ubiquitin carboxy-terminal hydrolase L1 binds to and stabilizes monoubiquitin in neuron. *Hum. Mol. Genet.* **2003**, *12*, 1945–1958. doi: 10.1093/hmg/ddg211.

3. Meray, R.K.; Lansbury P.T. Jr. Reversible monoubiquitination regulates the Parkinson disease-associated ubiquitin hydrolase UCH-L1. *J Biol Chem.* **2007**, *282*, 10567–10575. doi: 10.1074/jbc.M611153200.
4. Liu, Y.; Fallon L.; Lashuel, H.A.; Liu, Z.; Lansbury, P.T. Jr. The UCH-L1 gene encodes two opposing enzymatic activities that affect alpha-synuclein degradation and Parkinson's disease susceptibility. *Cell* **2002**, *111*, 209–218. doi: 10.1016/s0092-8674(02)01012-7.
5. McKeon, J.E.; Sha, D.; Li, L.; Chin, L.S. Parkin-mediated K63-polyubiquitination targets ubiquitin C-terminal hydrolase L1 for degradation by the autophagy-lysosome system. *Cell Mol. Life Sci.* **2015**, *72*, 1811–1824. doi: 10.1007/s00018-014-1781-2.
6. Lee, S.P.; Park, C.M.; Kim, K.S.; Kim, E.; Jeong, M.; Shin, J.Y.; Yun, C.H.; Kim, K.; Chock, P.B.; Chae, H.Z. Structural and biochemical analyses reveal ubiquitin C-terminal hydrolase-L1 as a specific client of the peroxiredoxin II chaperone. *Arch. Biochem. Biophys.* **2018**, *640*, 61–74. doi: 10.1016/j.abb.2018.01.003.
7. Kabuta, T.; Furuta, A.; Aoki, S.; Furuta, K.; Wada, K. Aberrant interaction between Parkinson disease-associated mutant UCH-L1 and the lysosomal receptor for chaperone-mediated autophagy. *J. Biol. Chem.* **2008**, *283*, 23731–23738. doi: 10.1074/jbc.M801918200.
8. Andersson, F.I.; Werrell, E.F.; McMorran, L.; Crone, W.J.; Das, C.; Hsu, S.T.; Jackson, S.E. The effect of Parkinson's-disease-associated mutations on the deubiquitinating enzyme UCH-L1. *J. Mol. Biol.* **2011**, *407*, 261–272. doi: 10.1016/j.jmb.2010.12.029.
9. Ham, S.J.; Lee, D.; Xu, W.J.; Cho, E.; Choi, S.; Min, S.; Park, S.; Chung, J. Loss of UCHL1 rescues the defects related to Parkinson's disease by suppressing glycolysis. *Sci Adv.* **2021**, *7*:eabg4574. doi: 10.1126/sciadv.abg4574.
10. Cerqueira, F.M.; von Stockum, S.; Giacomello, M.; Goliand, I.; Kakimoto, P.; Marchesan, E.; De Stefani, D.; Kowaltowski, A.J.; Ziviani, E.; Shirihai, O.S. A new target for an old DUB: UCH-L1 regulates mitofusin-2 levels, altering mitochondrial morphology, function and calcium uptake. *Redox Biol.* **2020**, *37*, 101676. doi: 10.1016/j.redox.2020.101676.
